# Supplementary material for: Sensing of HIV-1 by TLR8 activates human T cells and reverses latency
Source: PubMed Central journal article supplement (PMC6952430; doi:10.1038/s41467-019-13837-4), 2020-01-09
Supplement: 41467_2019_13837_MOESM1_ESM.pdf [file 41467_2019_13837_MOESM1_ESM.pdf]

Supplementary Information

**Sensing of HIV-1 by TLR8 activates human T cells and  
reverses latency**

H. Z. Meås, M. Haug et al.

**This PDF file includes:**

Supplementary Figures 1-7

Supplementary Tables 1-2

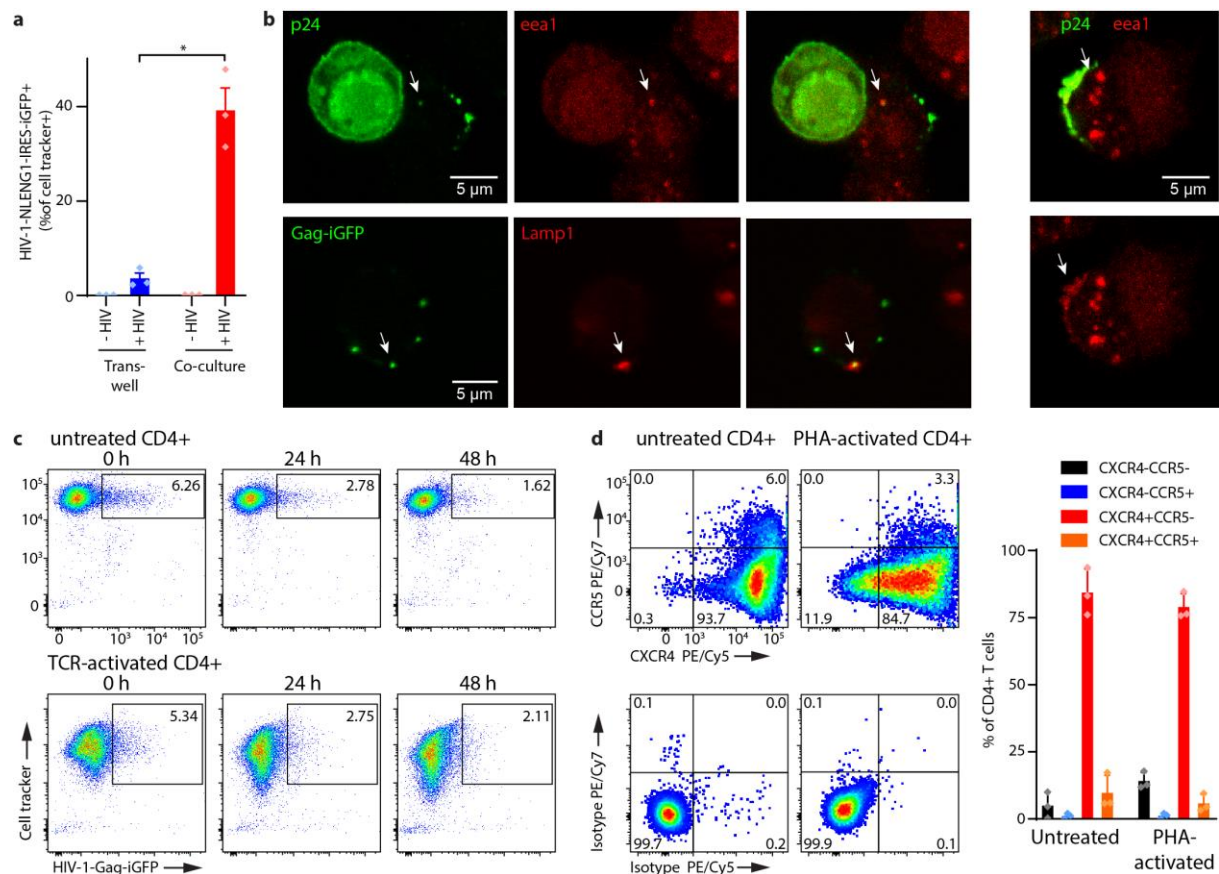

### Supplementary Fig. 1. Characterization of intracellular HIV compartments and frequencies of CD4+ T cells expressing CXCR4/CCR5.

**a** SupT1 were infected with NLENG1-IRES-eGFP virus for 48h prior to coculture with TCR-activated CD4+ (stained with CellTracker Red) together (co-culture) or separated (trans-well) by 0.4  $\mu$ m trans-well porous membrane barrier for 4 days. Frequencies of T cells (cell tracker red) expressing eGFP were quantified by flow cytometry, data represent means + SEM from three independent experiments. Statistical significance was determined by two-sided paired t-test on log transformed data, \*P < 0.05.

**b** Examples of EEA1 and LAMP1-positive compartments in CD4+ T cells containing HIV puncta (stained by anti-p24) after co-culture with HIV-1-expressing HEK293 cells. **c** Untreated or TCR-activated CD4+ T cells were co-cultured with HeLa cells expressing X4-tropic HIV-1-Gag-iGFP in the presence of the CXCR4 inhibitor AMD3100. Frequencies of T cells (cell tracker red) harboring HIV-1 (iGFP) were quantified by flow cytometry 0, 24 and 48h post infection/co-culture. Representative dot plot examples from a representative donor corresponding to quantification in main Fig. 1c. **d** Dot plot examples (left) and quantification (right) showing the frequency of untreated and PHA activated CD4+ T cells expressing CCR5 and CXCR4. Bottom dot plots show isotype controls, bars represent mean + SEM from three independent experiments. Source data are provided as a Source Data File.

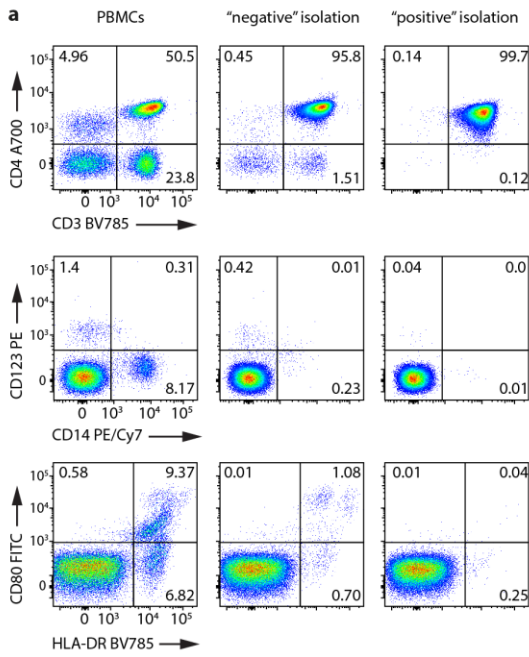

**b**

|          | PBMCs        | "Negative" isolation | "Positive" isolation |
|----------|--------------|----------------------|----------------------|
|          | Mean (SD)    | Mean (SD)            | Mean (SD)            |
| CD3+CD4+ | 50,86 (7,56) | 95,75 (1,17)         | 99,55 (0,19)         |
| CD3+CD8+ | 18,44 (6,49) | 0,34 (0,57)          | 0,61 (0,43)          |
| CD14+    | 6,87 (5,07)  | 0,18 (0,07)          | 0,27 (0,09)          |
| CD19+    | 3,37 (3,66)  | 0,05 (0,10)          | 0,10 (0,07)          |
| CD16+    | 13,46 (6,35) | 1,37 (0,54)          | 0,13 (0,11)          |
| CD303+   | 0,27 (0,20)  | 0,14 (0,12)          | 0,06 (0,06)          |
| CD123+   | 1,88 (0,38)  | 0,24 (0,26)          | 0,53 (1,00)          |
| HLA-DR+  | 12,74 (5,69) | 0,95 (0,68)          | 0,47 (0,29)          |
| CD80+    | 7,14 (8,36)  | 0,62 (0,51)          | 0,47 (0,58)          |

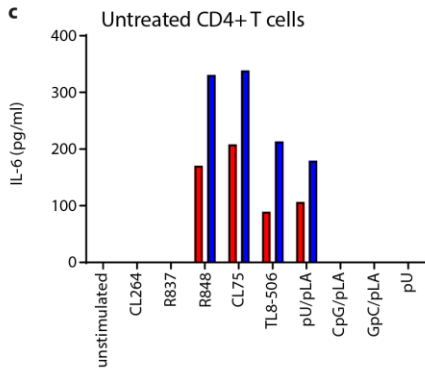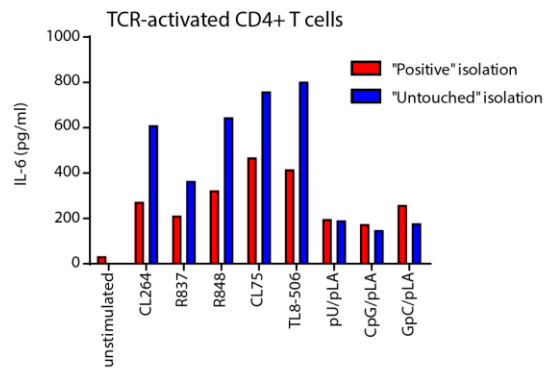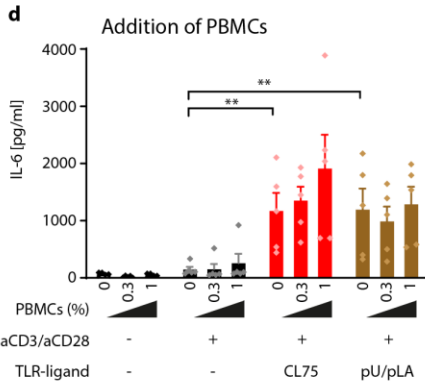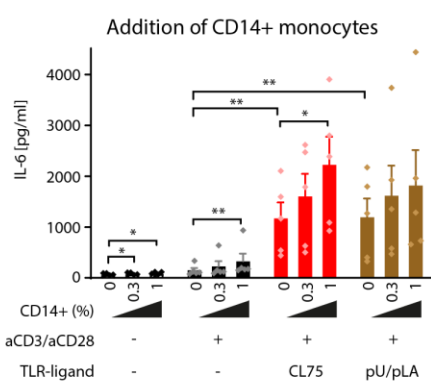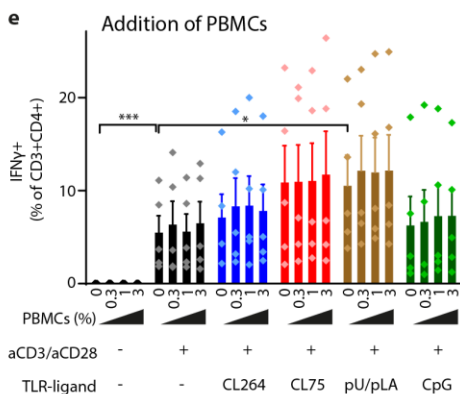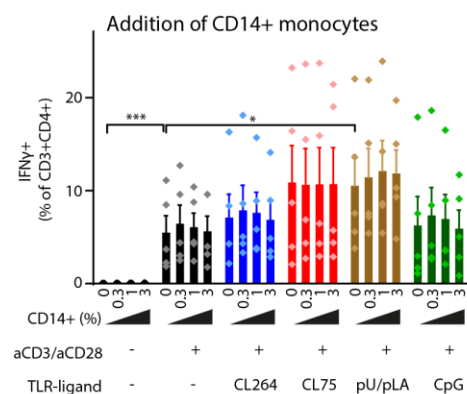

**Supplementary Fig. 2. Impact of T cell purity on TLR ligand induced IL-6 production.**

**a, b** Flow cytometric analysis of cell populations in PBMCs and CD4+ T cells isolated from PBMCs by depleting non-T cells (negative isolation) or via positive isolation using antibody-coated beads. **a** Representative example of CD4+ T cell purity in the different isolations. **b** Cell population frequencies determined from expression of select surface markers. Values represent mean +/- SD from 5 independent experiments (4 for PBMCs). **c** Comparison of TLR-induced IL-6 production from CD4+ T cells negatively ("untouched", purity > 95%) or positively (purity > 99 %) isolated from one donor. Untreated and TCR-activated CD4+ T cells from both populations were stimulated with 5 µg/ml ligands to TLR7 (CL264, R837), TLR7/8 (R848), TLR8 (CL75, TL8-506, pU/pLA) or TLR9 (CpG, GpC, 5 µM) for 24h. IL-6 in supernatants was analyzed by ELISA. Data are from one experiment. **d** Purified CD4+ T cells were activated by TCR +/- TLR-ligand stimulation in the presence of 0, 0.3 or 1 % of PBMCs depleted of CD4+ cells (left) or CD14+ monocytes (right). IL-6 secretion was measured by ELISA from supernatants 24 h post stimulation. Data represents means + SEM from five independent experiments. **e** Purified CD4+ T cells were combined with increasing doses (0-3%) of PBMCs depleted of CD4+ cells (left) or CD14+ monocytes (right) and activated by TCR +/- TLR-ligand stimulation for 48h before intracellular IFN-γ production from CD4+ T cells was assessed by flow cytometry, data represent means + SEM from five independent experiments. Statistical significance in **d** and **e** was determined from log-transformed data by two-way ANOVA with Dunnett's post-test; Significance levels: \* $p < 0.05$ ; \*\* $p < 0.01$ ; \*\*\* $p < 0.001$ . Source data are provided as a Source Data File.

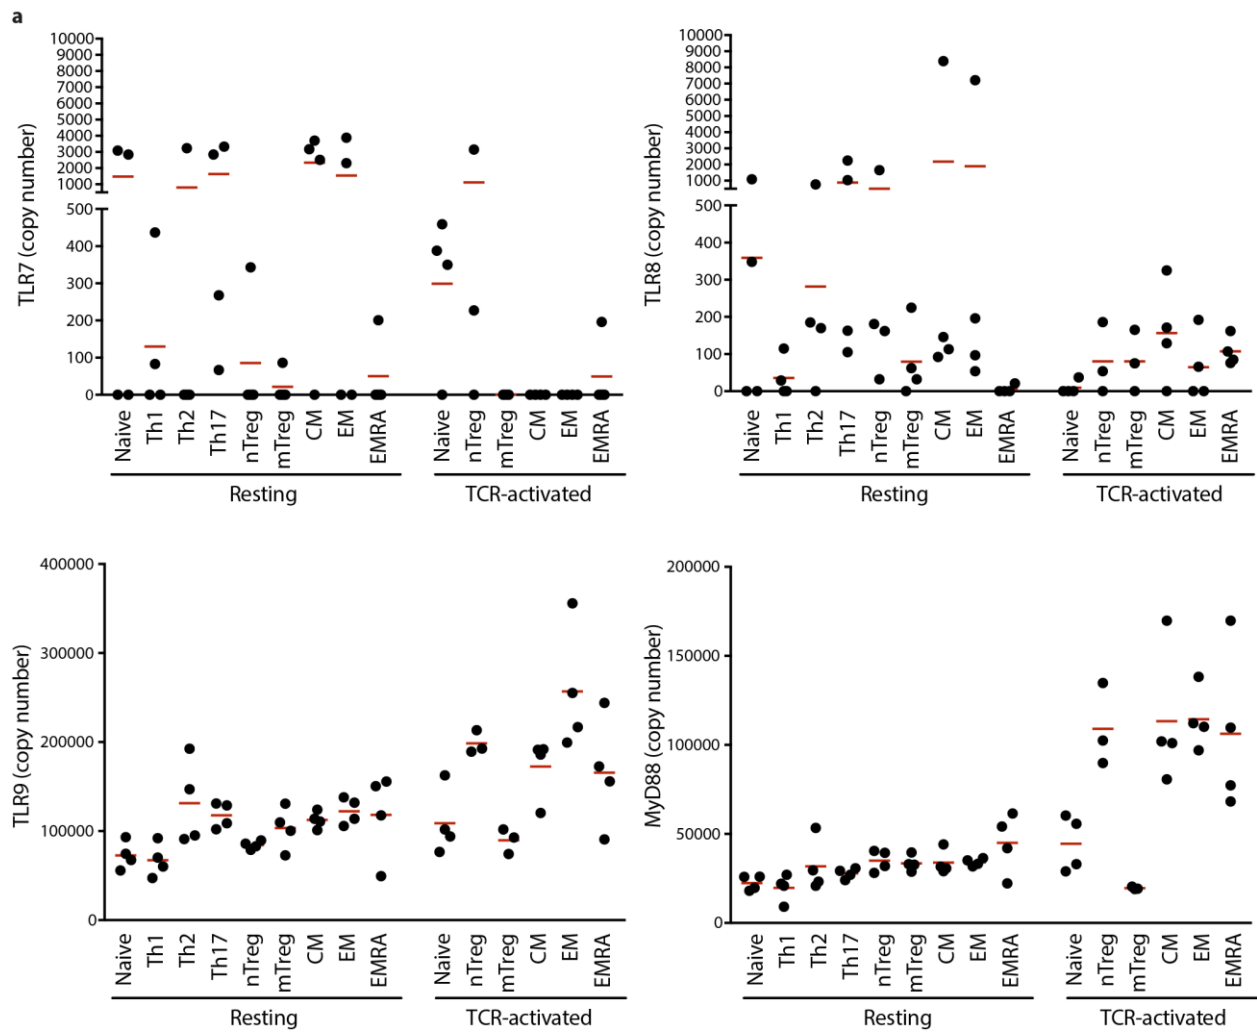

**Supplementary Fig. 3. Resting and TCR-activated CD4<sup>+</sup> T cells express TLR7/8/9 and MyD88.** Protein copy numbers of TLR7/8/9 and MyD88 in resting and TCR-activated subsets of CD4<sup>+</sup> T cells. Plots were generated from quantitative mass spectrometry-based proteomics data on FACS sorted CD4<sup>+</sup> T cell subsets obtained from Rieckmann *et al.*, doi: 10.1038/ni.3693. Mean values are indicated with red lines. Th = T helper; nTreg, mTreg = naïve or memory regulatory T cells; CM, EM = central or effector memory T cells; EMRA = effector memory RA<sup>+</sup> T cells.

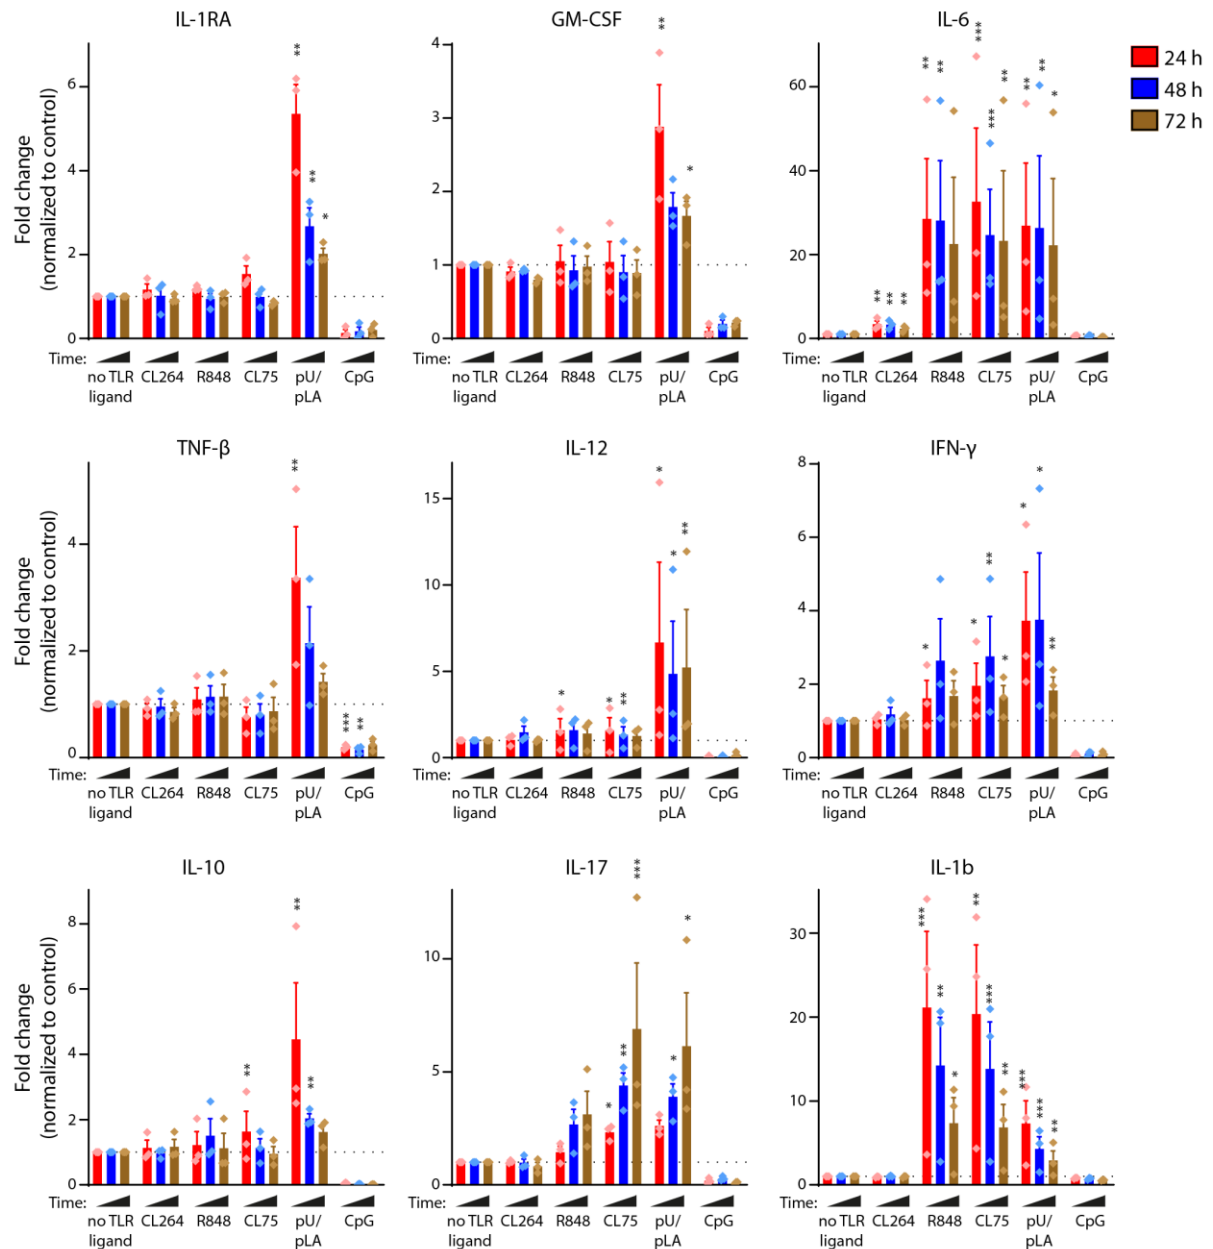

**Supplementary Fig. 4. Cytokine responses to TLR 7, 8 and 9 ligands in CD4+ T cells.**

CD4+ T cells were TCR activation in combination with 5  $\mu\text{g/ml}$  CL264 (TLR7), R848 (TLR7/8), CL75, pU/pLA (TLR8) or CpG (TLR9, 5  $\mu\text{M}$ ) for the times indicated. Cytokine levels in cell supernatants were analyzed using multiplex ELISA. Graphs represent mean values + SEM from 3 independent experiments normalized to TCR-activated CD4+ T cells activated without addition of TLR-ligands. Statistical significance was determined from log-transformed raw-data by two-way ANOVA followed by Dunnett's post-test. Significance levels from raw-data are indicated in the graphs for data with a more than 1.5-fold relative increase/decrease compared to TCR-activated cells; \* $p < 0.05$ ; \*\* $p < 0.01$ , \*\*\* $p < 0.001$ . Source data are provided as a Source Data File.

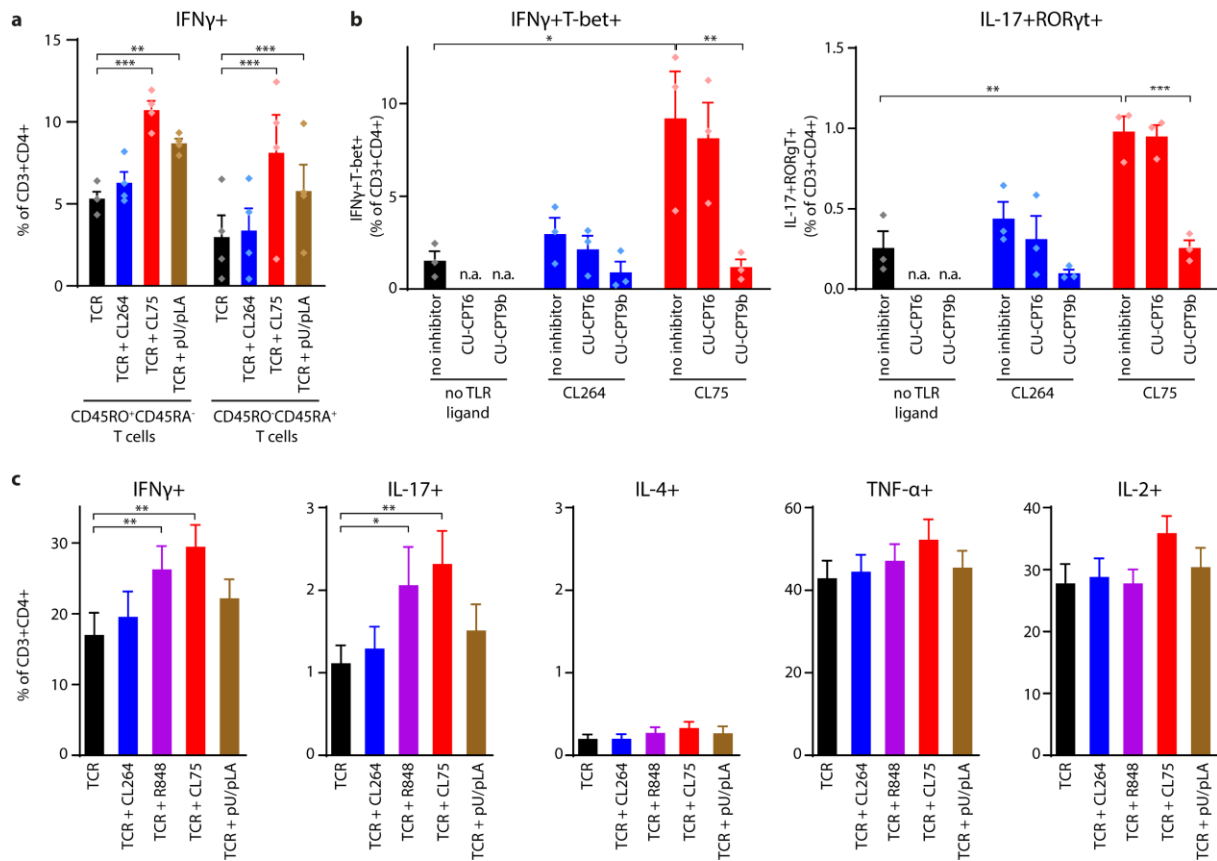

### Supplementary Fig. 5. Effect of TLR8 stimulation on T helper cell lineage commitment.

**a** Primary CD4<sup>+</sup> T cells were TCR-activated in the presence or absence of 5  $\mu$ g/ml CL264, CL75 or pU/pLA for 48h. Production of IFN- $\gamma$  from CD4<sup>+</sup> T cells with a memory (CD45RO<sup>+</sup>CD45RA<sup>-</sup>) or naïve (CD45RO<sup>-</sup>CD45RA<sup>+</sup>) phenotype was analyzed by intracellular flow cytometry. Bars represent mean + SEM from four independent experiments. **b** Primary CD4<sup>+</sup> T cells were TCR-activated in the presence or absence of 5  $\mu$ g/ml CL264 or CL75 and 5  $\mu$ M TLR8 inhibitor (CU-CPT9b) or control (CU-CPT6) for 72h. The fraction of T cells expressing the lineage-indicating transcription factors T-bet or ROR $\gamma$ t and producing IFN- $\gamma$  or IL-17 was analyzed by intracellular flow cytometry. Bars represent mean + SEM from three independent experiments. **c** CD4<sup>+</sup> T cells were differentiated for 8 days into CD4<sup>+</sup> effector T cells by TCR-activation in the presence or absence of 5  $\mu$ g/ml CL264 (TLR7), R848 (TLR7/8), CL75 or pU/pLA (TLR8). On day 8, cells were re-stimulated with PMA/ionomycin in the presence of protein-transport inhibitor for 6h and analyzed by intracellular flow cytometry for cytokine production. Percentages of CD3+CD4<sup>+</sup> T cells producing the indicated cytokines are shown. Bars represent mean + SEM from twelve independent experiments. Statistical significance was determined from log-transformed data by one-way ANOVA on memory and naïve datasets in **a** and data in **c**, by two-way ANOVA following Dunnett's post-test for data in **b**; \* $p$  < 0.05; \*\* $p$  < 0.01, \*\*\* $p$  < 0.001. Source data are provided as a Source Data File.

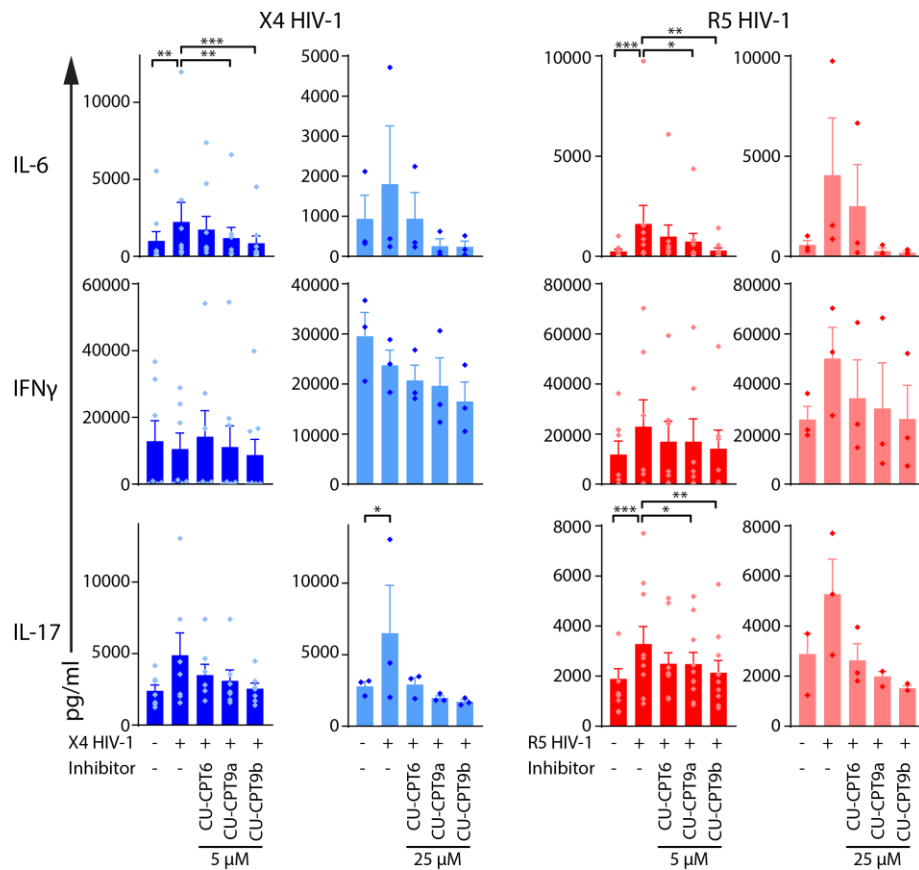

**Supplementary Fig. 6. Cytokine secretion from CD4+ T cells with endo-lysosomal HIV-1 infection.** Primary CD4+ T cells were pre-treated with CXCR4 inhibitor AMD3100 or CCR5 inhibitor Maraviroc for 24h, and TLR8-specific inhibitors CU-CPT9a, CU-CPT9b or the negative control compound CU-CPT6 for 2h, prior to concomitant TCR activation and co-culture with HEK293 cells infected with HIV-1-Gag-iGFP (X4 HIV-1) or HIV-Gag-iGFP JRFL (R5 HIV-1). Cytokines were analyzed in the supernatant 24h post infection by multiplex ELISA. Bars represent means + SEM from 7-10 independent experiments with 5  $\mu$ M inhibitor and 3 independent experiments with 25  $\mu$ M inhibitor. Statistical significance was determined by repeated measures one-way ANOVA with Dunnett's post-test on log-transformed data; \* $p$  < 0.05; \*\* $p$  < 0.01; \*\*\* $p$  < 0.001. Source data are provided as a Source Data File.



**a** Gating strategy HIV-1 infected CD4+ T cells (Figure 1c, Figure 7 and Supplementary Figure 1c)

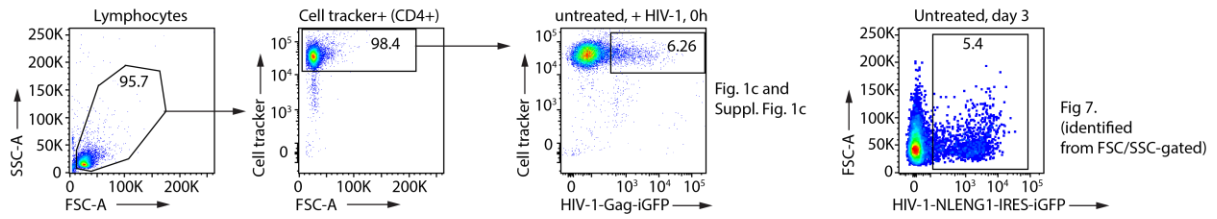

**b** Gating strategy HIV-1 infected CD4+ T cells by imaging flow cytometry (Figure 1d)

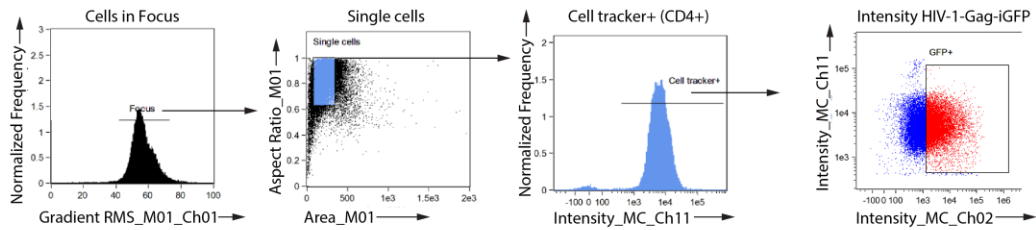

**c** Gating strategy CD4+ T cell activation markers (Figure 3b)

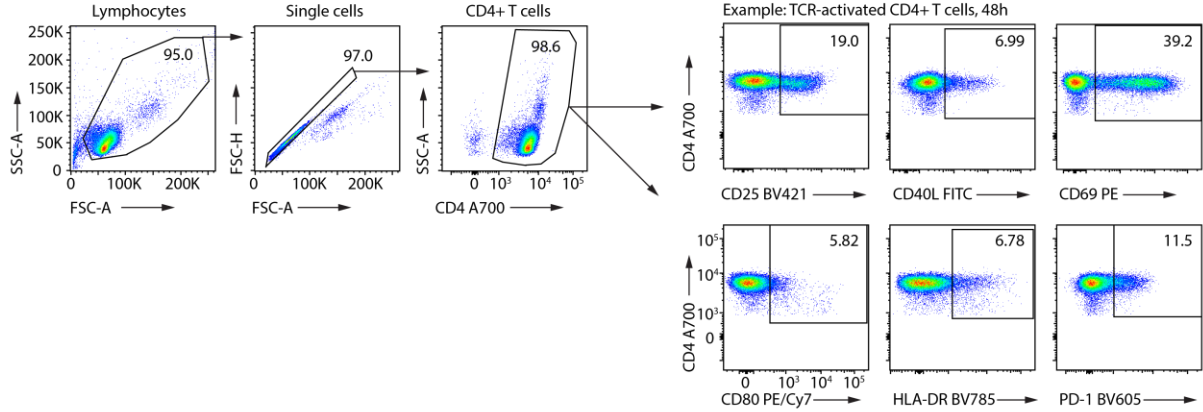

**d** Gating strategy phospho-flow cytometry (Figure 4)

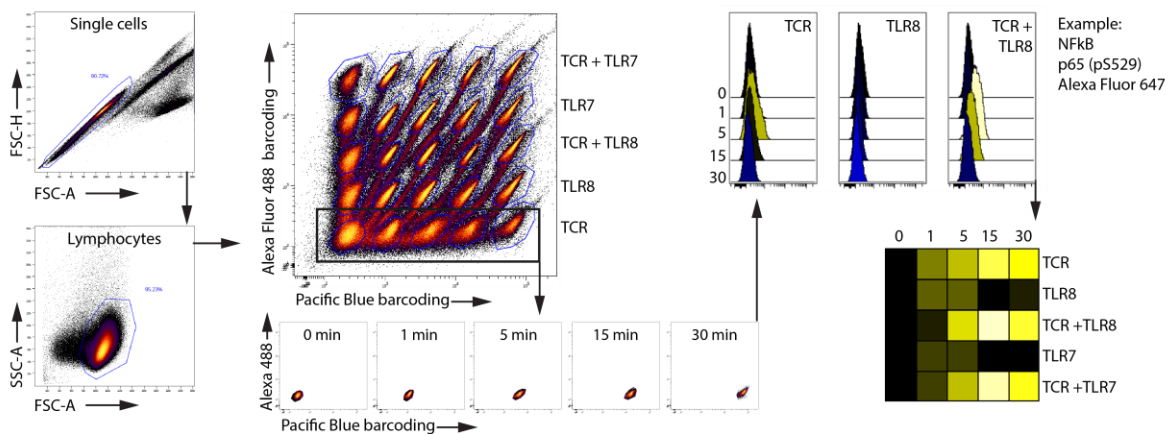

**e** Gating strategy cytokine-producing CD4+ T cells (Figures 5b+c+d, Supplementary Figures 2e, 5a+c)

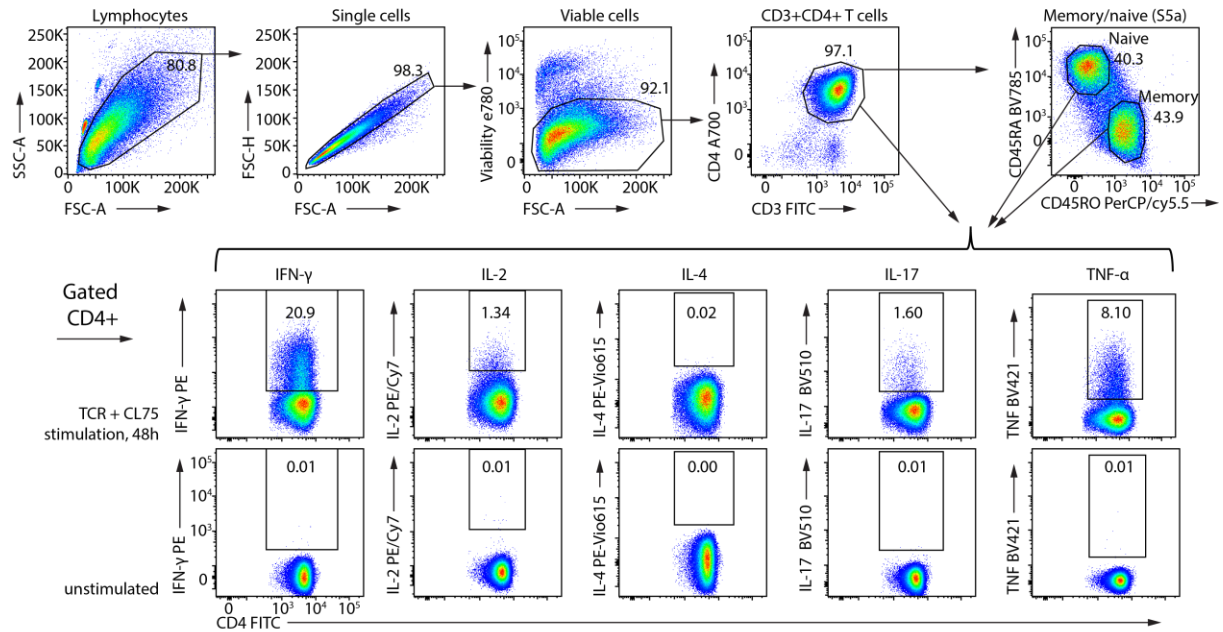

**f** Gating strategy transcription factors and cytokine-production (Supplementary Figure 5b)

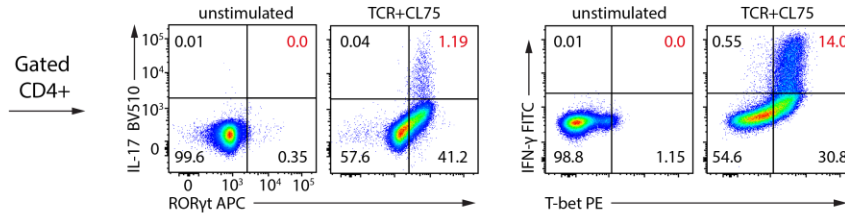

**g** Gating strategy transwell-experiment (Supplementary Figure 1a)

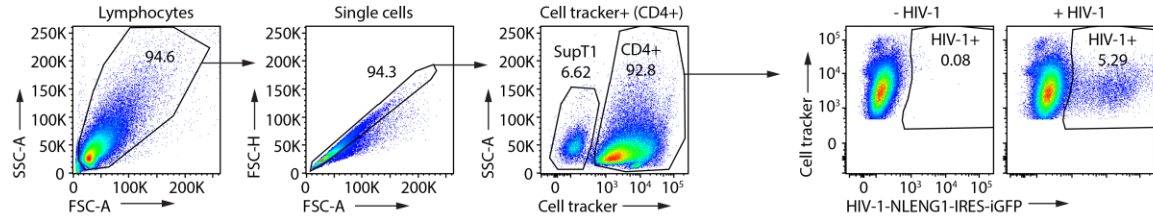

**h** Gating strategy CXCR4/CCR5 expression on CD4+ T cells (Supplementary Figure 1d)

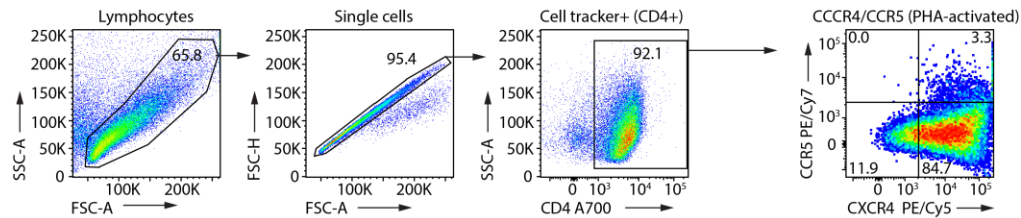

**i** Gating strategy CD4+ T cell purity analysis (Supplementary Figure 2a+b)

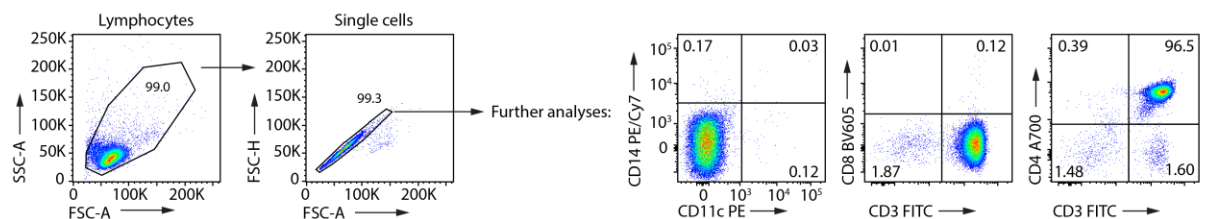

### **Supplementary Fig. 7. Gating strategies.**

**a** Gating strategy to identify HIV-1 infected CD4+ T cells in Figure 1c, Supplementary Figure 1c and Figure 7. **b** Gating strategy to identify HIV-1 infected CD4+ T cells by imaging flow cytometry in Figure 1d. **c** Gating strategy for analysis of CD4+ T cell activation marker expression in Figure 3b. **d** Gating strategy for phosphorylation analysis of signaling proteins in Figure 4. **e** Gating strategy for analysis of effector cytokine production from CD4+ T cells and memory and naïve subsets in Figures 5b, c and d, Supplementary Figure 2e and Supplementary Figures 5a and c. **f** Gating strategy for analysis of transcription factor expression and effector cytokine production from CD4+ T cells in Supplementary Figure 5b. **g** Gating strategy for analysis of HIV-1 positive CD4+ T cells in transwell-experiment in Supplementary Figure 1a. **h** Gating strategy for analysis of CXCR4 and CCR5 expression on CD4+ T cells in Supplementary Figure 1d. **i** Gating strategy for CD4+ T cell purity analysis shown in Supplementary Figure 2a and b. All gates for cytokine production, protein phosphorylation, surface marker and transcription factor expression as well as HIV-1 infection were defined from unstimulated or uninfected samples.

**Supplementary Table 1: HIV patients characteristics.**

| Patient ID | Sex | Age | Viral load<br>copies/ml | CD4+<br>cells/ $\mu$ l | Treatment regimen                                 |
|------------|-----|-----|-------------------------|------------------------|---------------------------------------------------|
| 1          | F   | 69  | < 20                    | 790                    | Efavirenz / Emtricitabine / Tenofovir             |
| 2          | M   | 42  | undetectable            | 790                    | Efavirenz / Emtricitabine / Tenofovir             |
| 3          | M   | 45  | undetectable            | 280                    | Efavirenz / Emtricitabine / Tenofovir             |
| 4          | M   | 35  | undetectable            | 710                    | Rilpivirine / Emtricitabine / Tenofovir           |
| 5          | M   | 27  | undetectable            | 720                    | Rilpivirine / Emtricitabine / Tenofovir           |
| 6          | F   | 37  | undetectable            | 1330                   | Lopinavir + Ritonavir / Emtricitabine / Tenofovir |
| 7          | M   | 30  | 119                     | 190                    | Efavirenz / Emtricitabine / Tenofovir             |
| 8          | M   | 57  | undetectable            | 470                    | Atazanavir / Ritonavir, Emtricitabine / Tenofovir |
| 9          | M   | 39  | < 20                    | 460                    | Darunavir / Cobicistat, Emtricitabine / Tenofovir |

## Supplementary Table 2.

Antibodies for confocal microscopy (CM), Western Blot (WB), flow cytometry (FC), cell stimulation (S) and cell depletion (D).

| Epitope                                            | Conjugate            | Clone      | Supplier                     | Catalog number | Dilution          |
|----------------------------------------------------|----------------------|------------|------------------------------|----------------|-------------------|
| EEA1                                               | unconjugated         | polyclonal | Santa Cruz                   | sc-33585       | 1:100 (CM)        |
| HIV1 p24                                           | unconjugated         | 39/5.4A    | abcam                        | ab9071         | 1:100 (CM)        |
| LAMP1                                              | unconjugated         | H4A3       | Santa Cruz                   | sc-20011       | 1:100 (CM)        |
| LAMP1                                              | unconjugated         | polyclonal | abcam                        | ab24170        | 1:100 (CM)        |
| Goat anti-mouse<br>(LAMP1 Santa Cruz,<br>p24, GPF) | Alexa Fluor 555      | polyclonal | Thermofisher                 | A-21422        | 2µg/ml (CM)       |
| Goat anti-rabbit<br>(LAMP1 abcam,<br>EEA1)         | Alexa Fluor 405      | polyclonal | Thermofisher                 | A-31556        | 2µg/ml (CM)       |
|                                                    |                      |            |                              |                |                   |
| Goat anti-rabbit                                   | HRP                  | polyclonal | Dako                         | P0448          | 1:(2000 x F) (WB) |
| TLR8                                               | unconjugated         | D3Z6J      | Cell Signaling<br>Technology | 11886          | 1:1000 (WB)       |
| COX4                                               | unconjugated         | SP2        | abcam                        | ab33985        | 1:1000 (WB)       |
|                                                    |                      |            |                              |                |                   |
| Akt (pS473)                                        | Alexa Fluor 647      | D9E        | Cell Signaling<br>Technology | 4075           | 1:25 (FC)         |
| CCR5 (CD195)                                       | PE/Cy7               | J418F1     | BioLegend                    | 359107         | 1:100 (FC)        |
| CD11c                                              | PE                   | 3.9        | eBioscience                  | 12-0116-42     | 1:50 (FC)         |
| CD123                                              | PE                   | AC145      | Miltenyi Biotec              | 130-113-326    | 1:50 (FC)         |
| CD14                                               | PE/Cy7               | 61D3       | eBioscience                  | 25-0149-42     | 1:50 (FC)         |
| CD16                                               | FITC                 | NKP15      | BD Biosciences               | 347523         | 1:10 (FC)         |
| CD19                                               | PE                   | HIB19      | eBioscience                  | 12-0199-42     | 1:50 (FC)         |
| CD25                                               | Brilliant Violet 510 | M-A251     | BioLegend                    | 356120         | 1:50 (FC)         |
| CD25                                               | PE                   | 4E3        | Miltenyi Biotec              | 130-113-282    | 1:25 (FC)         |
| CD3                                                | FITC                 | OKT3       | eBioscience                  | 11-0037-42     | 1:100 (FC)        |
| CD3                                                | Brilliant Violet 785 | OKT3       | BioLegend                    | 317330         | 1:100 (FC)        |
| CD303                                              | APC                  | AC144      | Miltenyi Biotec              | 130-113-190    | 1:50 (FC)         |
| CD3ζ (CD247)<br>(pY142)                            | Alexa Fluor 647      | K25-407.69 | BD Biosciences               | 558489         | 1:10 (FC)         |
| CD4                                                | Alexa Fluor 700      | OKT4       | eBioscience                  | 56-0048-82     | 1:100 (FC)        |
| CD40L                                              | FITC                 | 24-31      | BioLegend                    | 310804         | 1:100 (FC)        |
| CD45RA                                             | Brilliant Violet 785 | HI-100     | BioLegend                    | 304140         | 1:100 (FC)        |
| CD45RO                                             | PerCP/Cy5.5          | UCHL1      | BioLegend                    | 304222         | 1:100 (FC)        |
| CD69                                               | PE                   | FN50       | BioLegend                    | 310906         | 1:100 (FC)        |
| CD8                                                | Brilliant Violet 605 | M5E2       | BioLegend                    | 301814         | 1:100 (FC)        |
| CD80                                               | PE/Cy7               | 2D10       | BioLegend                    | 305218         | 1:100 (FC)        |
| CD80                                               | FITC                 | L307       | BD Biosciences               | 557226         | 1:10 (FC)         |
| CXCR4 (CD184)                                      | PE/Cy5               | 12G5       | BioLegend                    | 306507         | 1:100 (FC)        |
| HLA-DR                                             | Brilliant Violet 785 | L243       | BioLegend                    | 307642         | 1:100 (FC)        |
| IFN-γ                                              | PE                   | 4S.B3      | eBioscience                  | 12-7319-42     | 1:50 (FC)         |

|                                   |                      |                |                           |             |                  |
|-----------------------------------|----------------------|----------------|---------------------------|-------------|------------------|
| IFN- $\gamma$                     | FITC                 | REA600         | Miltenyi Biotec           | 130-113-497 | 1:25 (FC)        |
| I $\kappa$ B alpha (pS32/pS36)    | eFluor 660           | RILYB3R        | eBioscience               | 50-9035-42  | 1:10 (FC)        |
| IL-17                             | Brilliant Violet 510 | BL168          | BioLegend                 | 512330      | 1:50 (FC)        |
| IL-2                              | PE/Cy7               | MQ1-17H12      | eBioscience               | 25-7029-42  | 1:50 (FC)        |
| IL-4                              | PE-Vio615            | 7A3-3          | Miltenyi Biotec           | 130-107-144 | 1:25 (FC)        |
| NF- $\kappa$ B p65 (pS529)        | Alexa Fluor 647      | K10-895.12.50  | BD Biosciences            | 558422      | 1:33 (FC)        |
| NF- $\kappa$ B p65 (pS536)        | Alexa Fluor 647      | 93H1           | Cell Signaling Technology | 4887        | 1:100 (FC)       |
| p38 MAPK (pT180/pY182)            | Alexa Fluor 647      | 28B10          | Cell Signaling Technology | 4552        | 1:50 (FC)        |
| p44/42 MAPK (Erk1/2, pT202/pY204) | Alexa Fluor 647      | E10            | Cell Signaling Technology | 4375        | 1:100 (FC)       |
| PD-1                              | Brilliant Violet 605 | EH12.2H7       | BioLegend                 | 329924      | 1:100 (FC )      |
| ROR $\gamma$ t                    | APC                  | AFKJS-9        | eBioscience               | 17-6988-82  | 1:50 (FC)        |
| S6 (pS235/ pS236)                 | Alexa Fluor 647      | D57.2.2E       | Cell Signaling Technology | 4851        | 1:133 (FC)       |
| SLP-76 (pY128)                    | Alexa Fluor 647      | J141-668.36.58 | BD Biosciences            | 558438      | 1:33 (FC)        |
| STAT3 (pY705)                     | Alexa Fluor 647      | 4/P-STAT3      | BD Biosciences            | 557815      | 1:10 (FC)        |
| T-bet                             | PE                   | 4B10           | eBioscience               | 12-5825-82  | 1:50 (FC)        |
| TNF- $\alpha$                     | Brilliant Violet 421 | Mab11          | BioLegend                 | 502932      | 1:50 (FC)        |
| ZAP70 (pY319)                     | Alexa Fluor 647      | 17A/P-ZAP70    | BD Biosciences            | 557817      | 1:10 (FC)        |
|                                   |                      |                |                           |             |                  |
| CD28                              | unconjugated         | CD28.2         | eBioscience               | 16-0289-85  | 1 $\mu$ g/ml (S) |
| CD3                               | unconjugated         | OKT3           | eBioscience               | 16-0037-85  | 5 $\mu$ g/ml (S) |
|                                   |                      |                |                           |             |                  |
| CD25                              | Biotin               | BC96           | eBioscience               | 13-0259-82  | 1:10 (D)         |
| CD69                              | Biotin               | FN50           | eBioscience               | 13-0699-82  | 1:10 (D)         |
| HLA-DR                            | Biotin               | LN3            | eBioscience               | 13-9956-82  | 1:10 (D)         |
